# Supplementary material for: Temporal transcription factors determine circuit membership by permanently altering motor neuron-to-muscle synaptic partnerships
Source: eLife journal article supplement (doi:10.7554/elife.56898), 2020-05-11
Supplement: supp [file elife-56898-supp-v1.zip]

Archive with 11 entries (11 files):
- elife_poa_e56898_Figure_1_figure_supplement_1.pdf
- elife_poa_e56898_Figure_1_figure_supplement_2.pdf
- elife_poa_e56898_Figure_4_figure_supplement_1.pdf
- elife_poa_e56898_Figure_5_figure_supplement_1.pdf
- elife_poa_e56898_Figure_6_figure_supplement_1.pdf
- elife_poa_e56898_Figure_1_source_data_1.docx
- elife_poa_e56898_Figure_1_figure_supplement_2_source_data_1.docx
- elife_poa_e56898_Figure_3_source_data_1.docx
- elife_poa_e56898_Figure_4_source_data_1.docx
- elife_poa_e56898_Figure_5_source_data_1.docx
- elife_poa_e56898_Transparent_Reporting_File.docx
