# Supplementary material for: Temporal transcription factors determine circuit membership by permanently altering motor neuron-to-muscle synaptic partnerships
Source: eLife journal article supplement (doi:10.7554/elife.56898), 2020-05-11
Supplement: supp [file elife-56898-supp-v1.zip › elife_poa_e56898_Figure_6_figure_supplement_1.pdf]

## x-y-z-t calcium imaging

**A** x-y imaging area does not vary

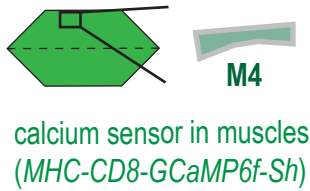

**B** Acquire repeating z-stacks over time

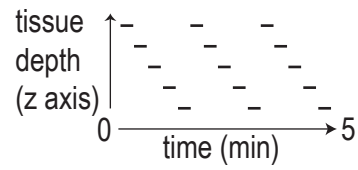

**D** Time series to single  $\Delta F$  x-y image

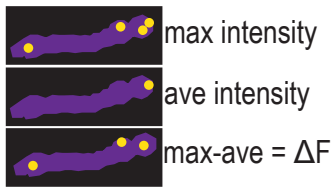

**C** z-stacks to x-y time series

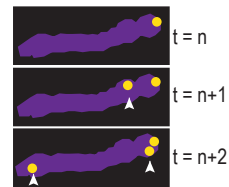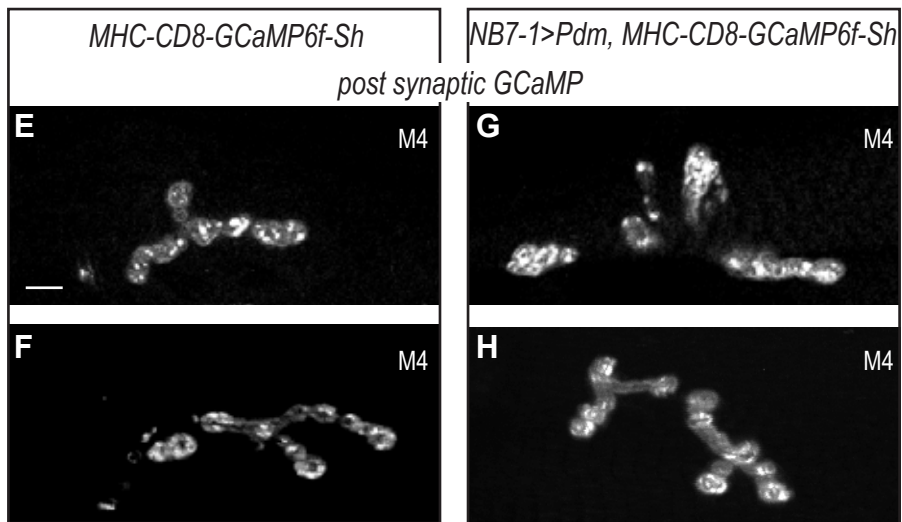

Figure 6-figure supplement
