# Supplementary figures and images for: Temporal transcription factors determine circuit membership by permanently altering motor neuron-to-muscle synaptic partnerships
Source: eLife journal article supplement (doi:10.7554/elife.56898), 2020-05-11

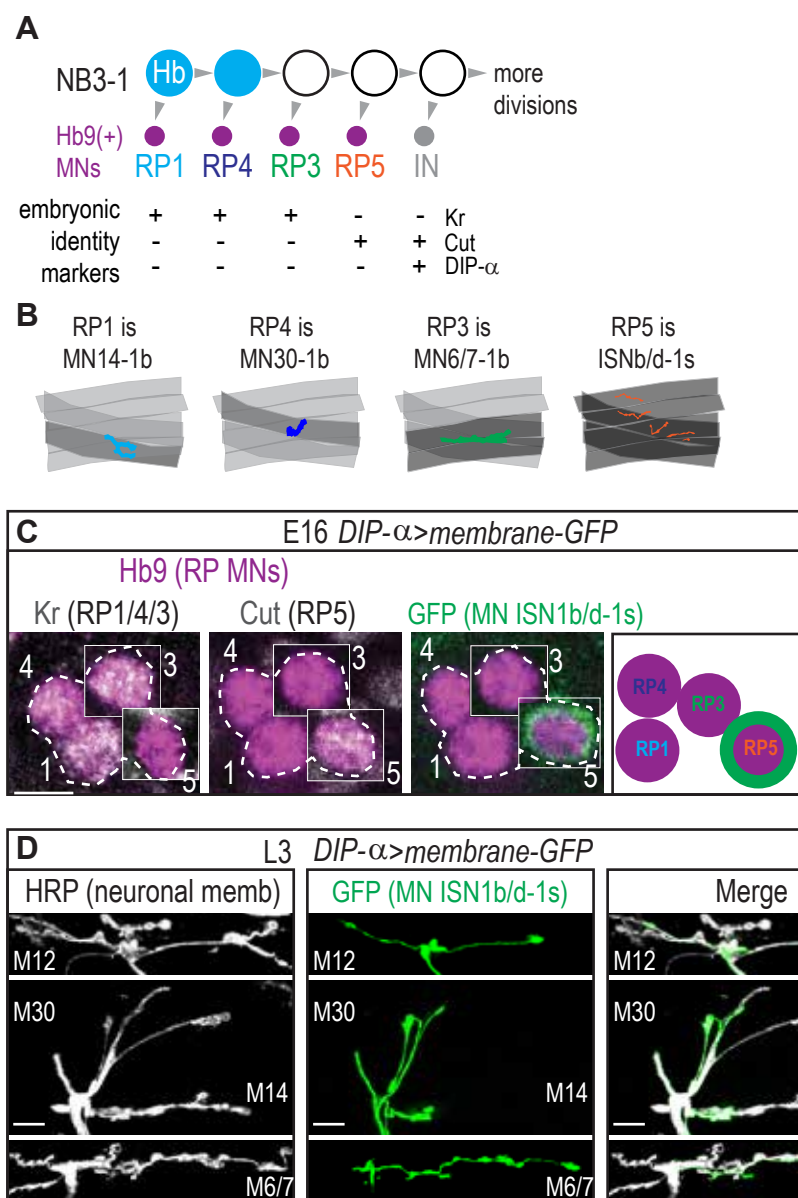

Figure 1--figure supplement 1

Supplement: supp [file elife-56898-supp-v1.zip › elife_poa_e56898_Figure_1_figure_supplement_1.pdf]

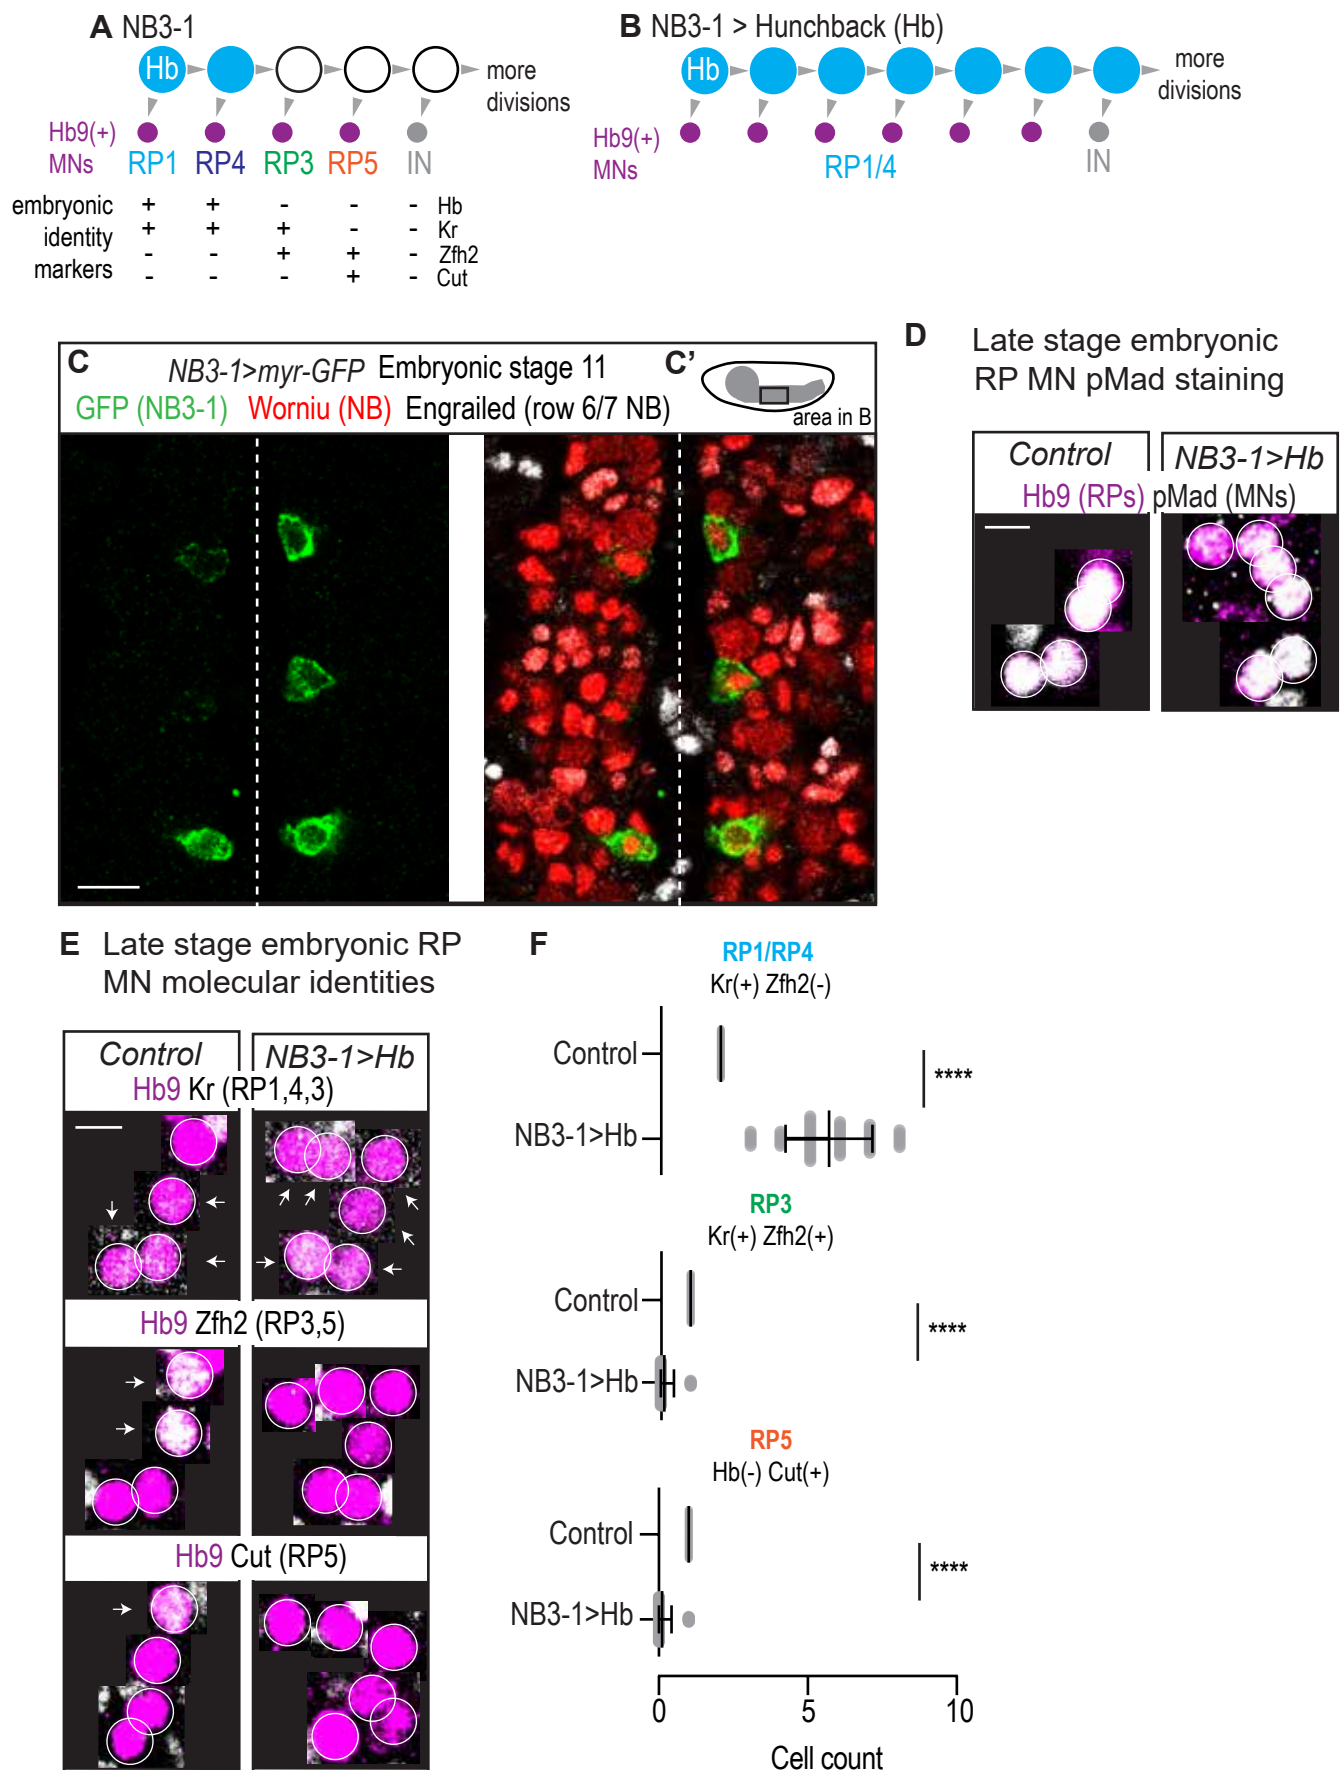

Figure 1--figure supplement 2

Supplement: supp [file elife-56898-supp-v1.zip › elife_poa_e56898_Figure_1_figure_supplement_2.pdf]

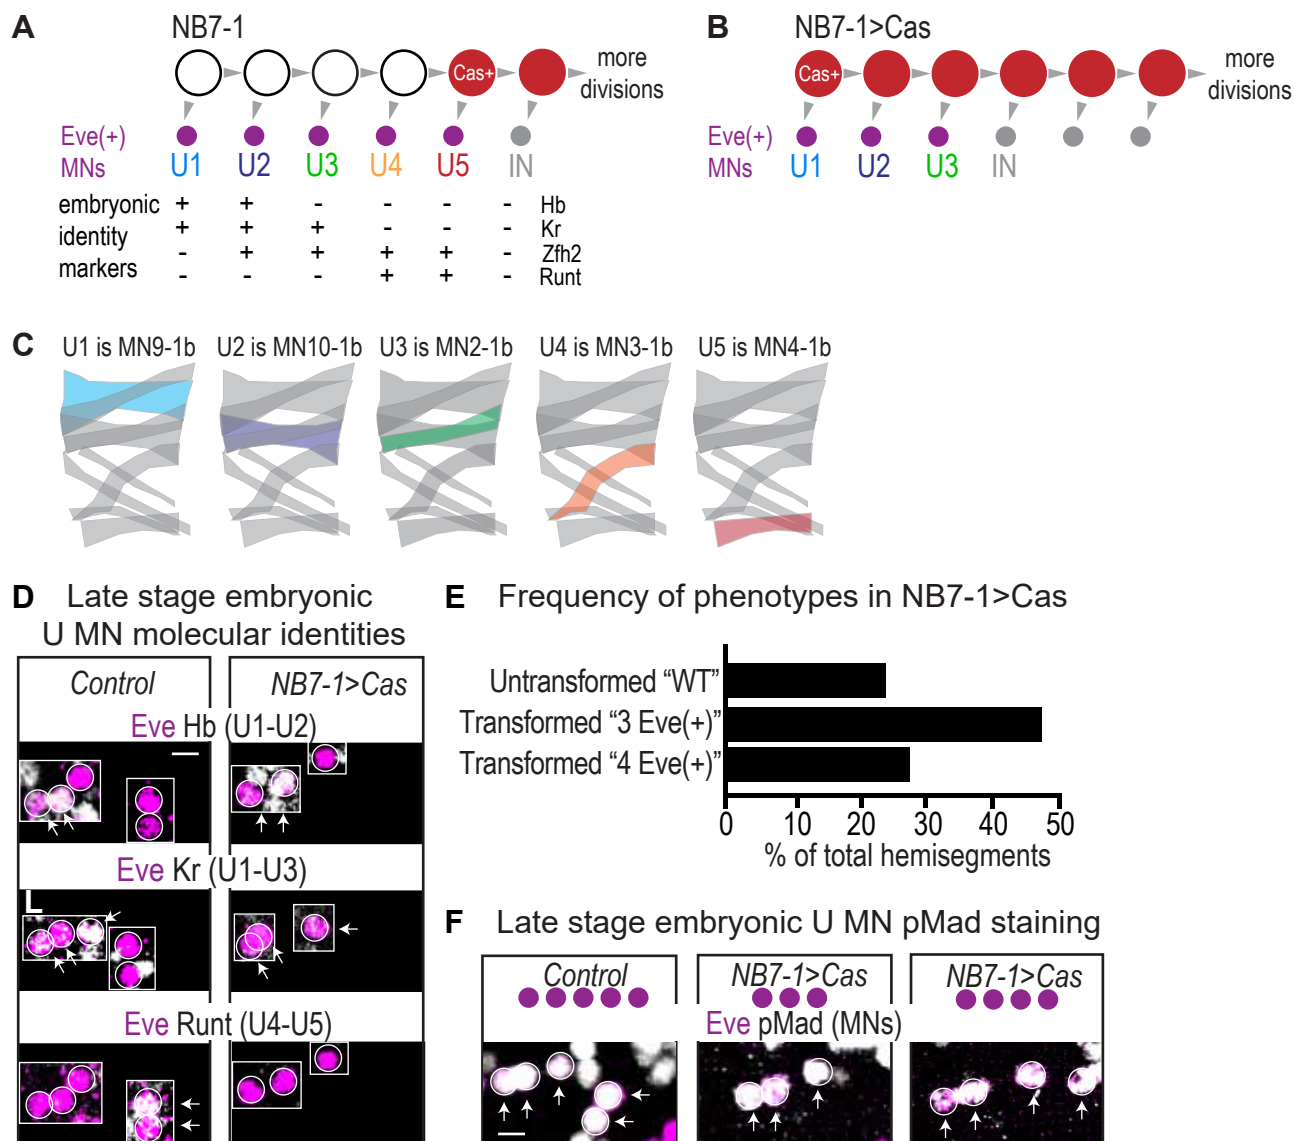

Figure 4--figure supplement 1

Supplement: supp [file elife-56898-supp-v1.zip › elife_poa_e56898_Figure_4_figure_supplement_1.pdf]

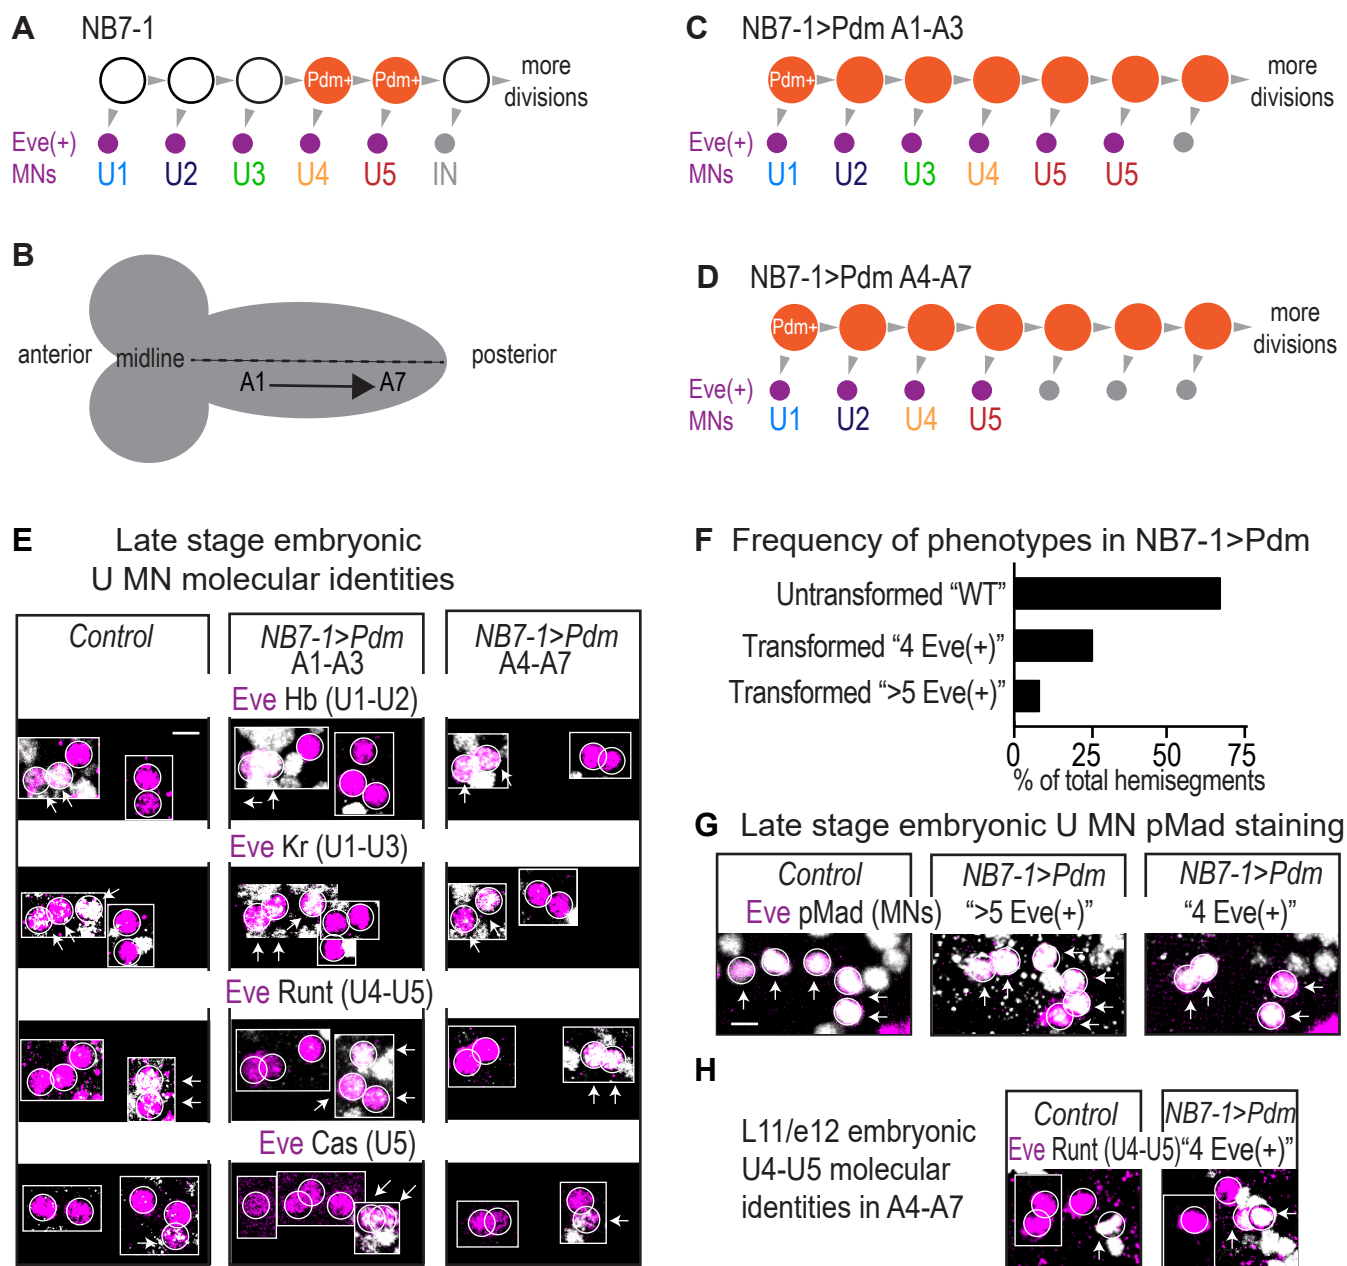

Figure 5--figure supplement

Supplement: supp [file elife-56898-supp-v1.zip › elife_poa_e56898_Figure_5_figure_supplement_1.pdf]
